# Supplementary material
Source: PubMed Central journal article supplement (PMC9905272)
Supplement: NIHMS1845816-supplement-1845816_Sup_Material.pdf [file NIHMS1845816-supplement-1845816_Sup_Material.pdf]

## Supplemental Information

### **AUTS2 controls neuronal lineage choice through a novel PRC1-independent complex and BMP inhibition**

Zhuangzhuang Geng<sup>1</sup>, Qiang Wang<sup>1</sup>, Weili Miao<sup>2</sup>, Trevor Wolf<sup>3</sup>, Jessenia Chavez<sup>1</sup>, Emily Giddings<sup>3</sup>, Ryan Hobbs<sup>4</sup>, David J. DeGraff<sup>5,6</sup>, Yinsheng Wang<sup>2</sup>, James Stafford<sup>3</sup>, Zhonghua Gao<sup>1,6,7,#</sup>

1, Departments of Biochemistry and Molecular Biology, Penn State College of Medicine, Hershey, PA 17033

2, Department of Chemistry, University of California at Riverside, Riverside, CA 92521

3, Department of Neurological Sciences, Larner College of Medicine, University of Vermont, Burlington, VT 05405

4, Department of Dermatology, Penn State College of Medicine, Hershey, PA 17033

5, Department of Pathology and Laboratory Medicine, Penn State College of Medicine, Hershey, PA 17033

6, Penn State Hershey Cancer Institute, Hershey, PA 17033

7, The Stem Cell and Regenerative Biology Program, Penn State College of Medicine, Hershey, PA 17033

#, correspondence author, [zgao1@pennstatehealth.psu.edu](mailto:zgao1@pennstatehealth.psu.edu)

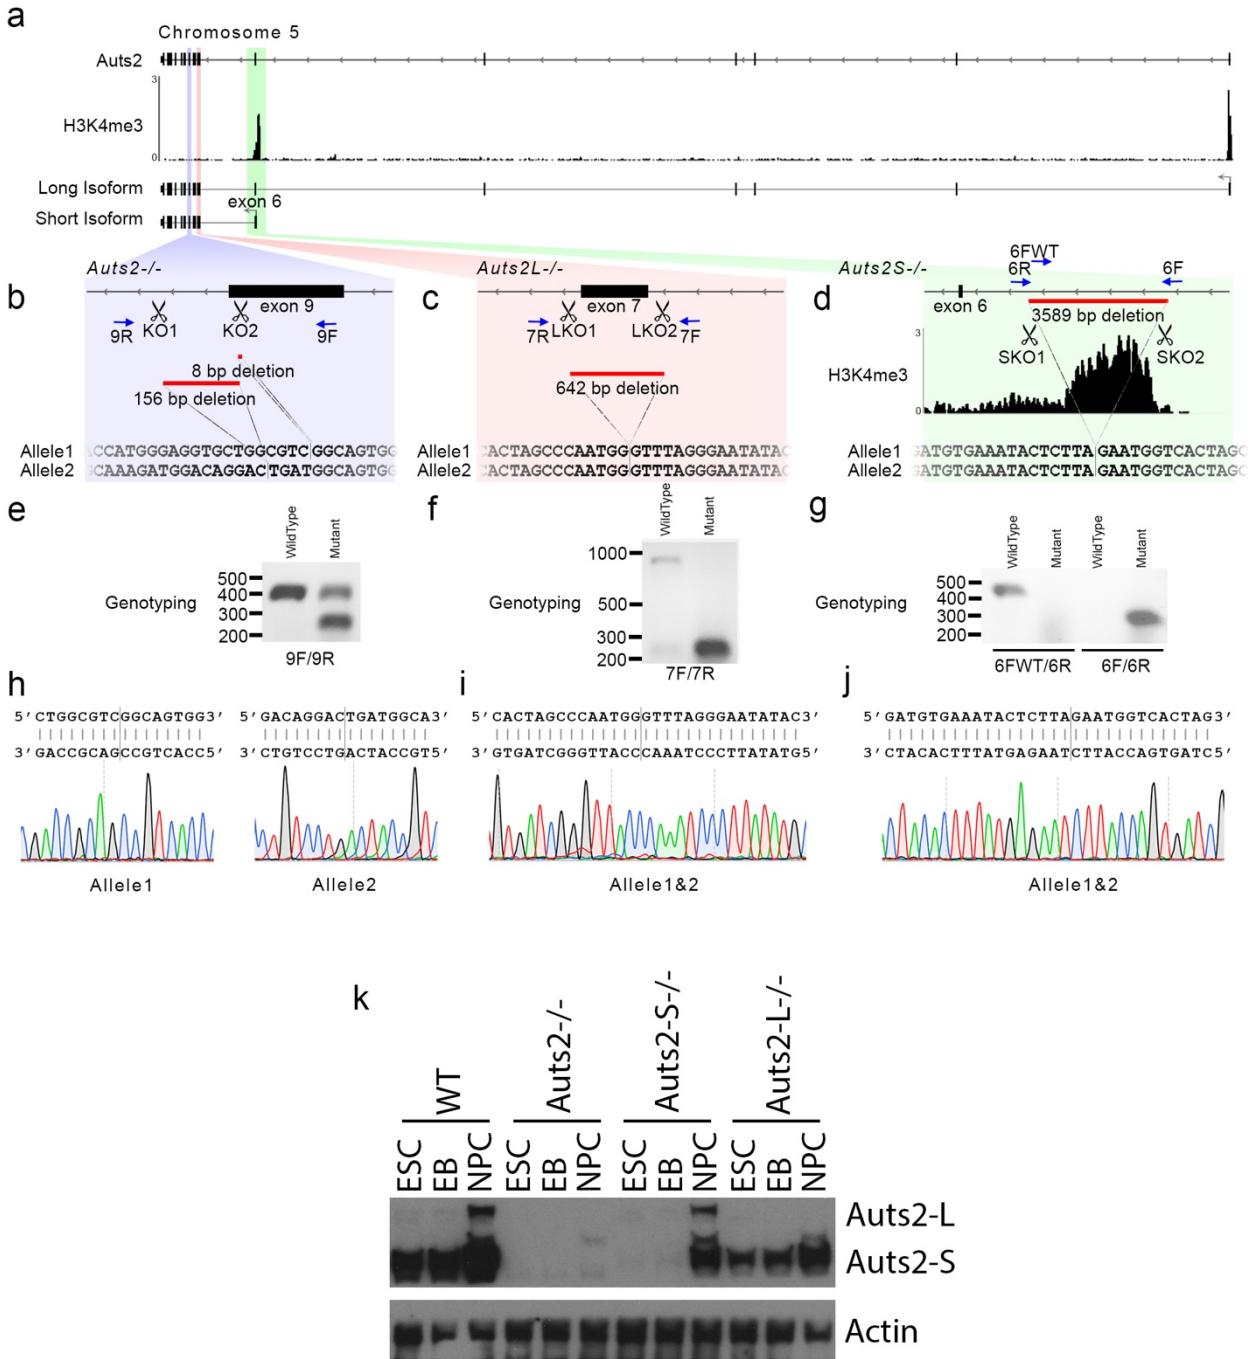

**Figure S1. Design, generation and validation of mouse ESC lines with *Auts2* deletion.** *a*, Schematic representation of the genetic locus of mouse *Auts2*. H3K4me3 peaks, indicating the two transcription start sites, were obtained from previous ChIP-seq analysis <sup>6</sup>. Two major transcripts, one referred to as “long” and the other referred to as “short” isoforms are shown at the bottom. *b-d*, Targeting strategy and final products of CRISPR/Cas9-mediated gene editing of *Auts2* locus. In each cell line, a pair of sgRNAs (labeled by scissors) were used and the deleted regions are indicated by red bars. Blue arrows indicate genotyping primers. Post-editing sequences are shown for both alleles. The two alleles in the *Auts2*<sup>-/-</sup> line were edited differently; one has an 8 bp frameshift deletion and the other a 156 bp deletion that spans the splicing junction (*b*). Identical editing events are present in both *Auts2L*<sup>-/-</sup> (*c*) and *Auts2S*<sup>-/-</sup> (*d*) lines. *e-g*, Genotyping PCR results for edited lines. *h-j*, Sanger sequencing results for edited lines. *k*, Immunoblotting to confirm the disruption of specific isoforms of *Auts2* in edited lines.

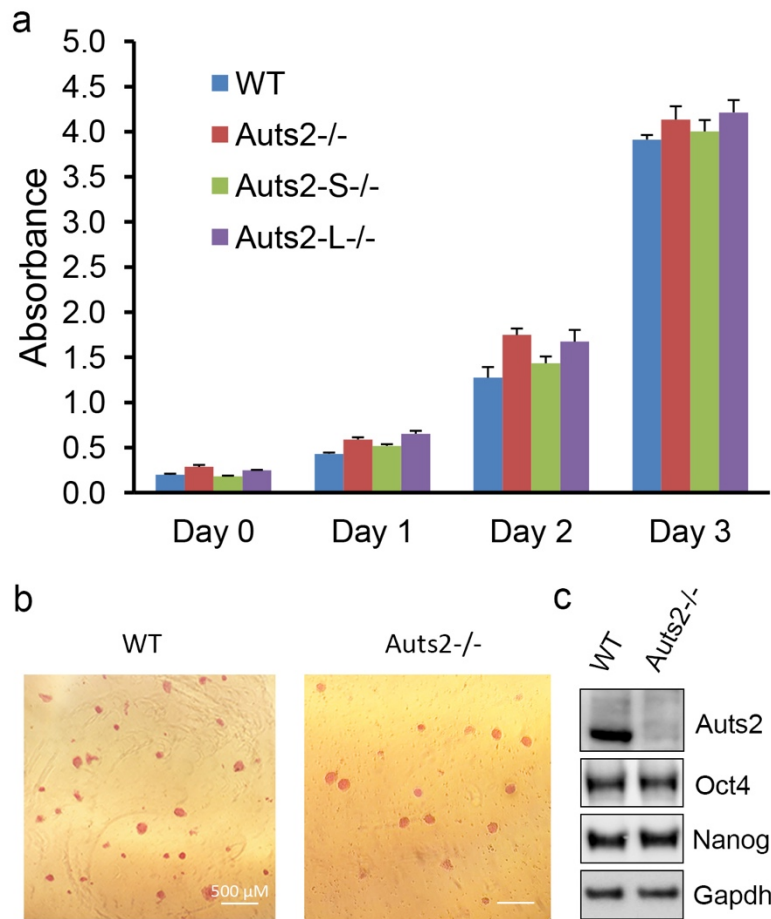

**Figure S2. Loss of Auts2 does not affect ESC self-renewal and proliferation.** *a*, Alkaline phosphatase activity staining in WT and *Auts2*<sup>-/-</sup> ESCs. *b*, Immunoblotting shows no obvious difference in the protein level of Oct4 and Nanog, two pluripotent markers, between WT and *Auts2*<sup>-/-</sup> ESCs. *c*, MTT cell proliferation assay to measure the growth rate of ESCs at various days. All mean values and standard deviations were calculated from four independent measurements. No significant differences were found among ESCs of all genotypes.

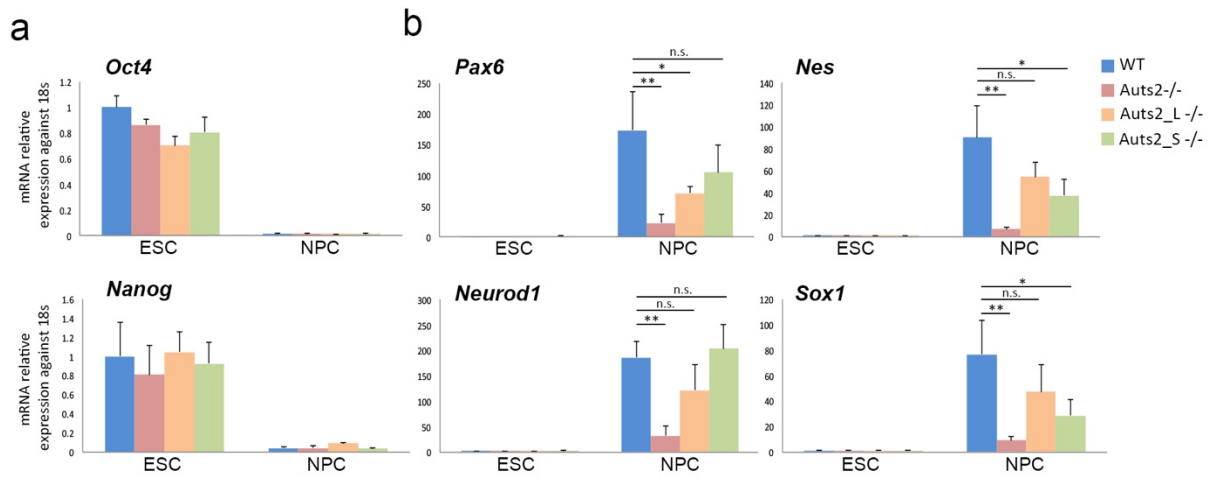

**Figure S3. Expression of pluripotency and NPC markers in ESCs with *AutS2* deletion.** *a*, Quantitative RT-PCR analysis of expression pluripotency markers (*Oct4* and *Nanog*) in WT, *AutS2*<sup>-/-</sup>, *AutS2L*<sup>-/-</sup> and *AutS2S*<sup>-/-</sup> ESCs and NPCs. *b*, Quantitative RT-PCR analysis of NPC markers (*Pax6*, *Nes*, *Neurod1* and *Sox1*). Expression levels are normalized relative to those in WT ESCs. All mean values and standard deviations were calculated from three independent measurements. \* P<0.05, \*\* P<0.01, n.s., not significant, by two-sided t-test.

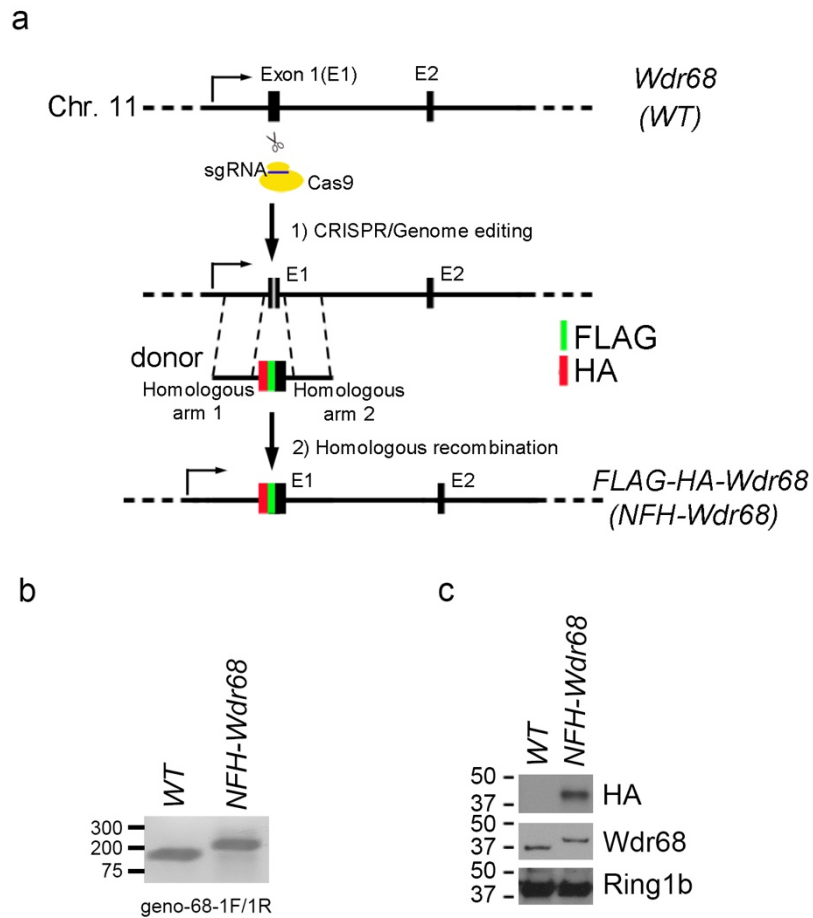

**Figure S4. Generation of an ESC line that expresses FLAG-HA-Wdr68.** *a*, Schematic for the CRISPR/Cas9-mediated knock-in of FLAG-HA-Wdr68 in E14 cells. *b*, Agarose gel picture shows the PCR products of genomic DNA isolated from WT and FLAG-HA-Wdr68 cells. *c*, Immunoblotting detected the expression of FLAG-HA-Wdr68 in edited cells.

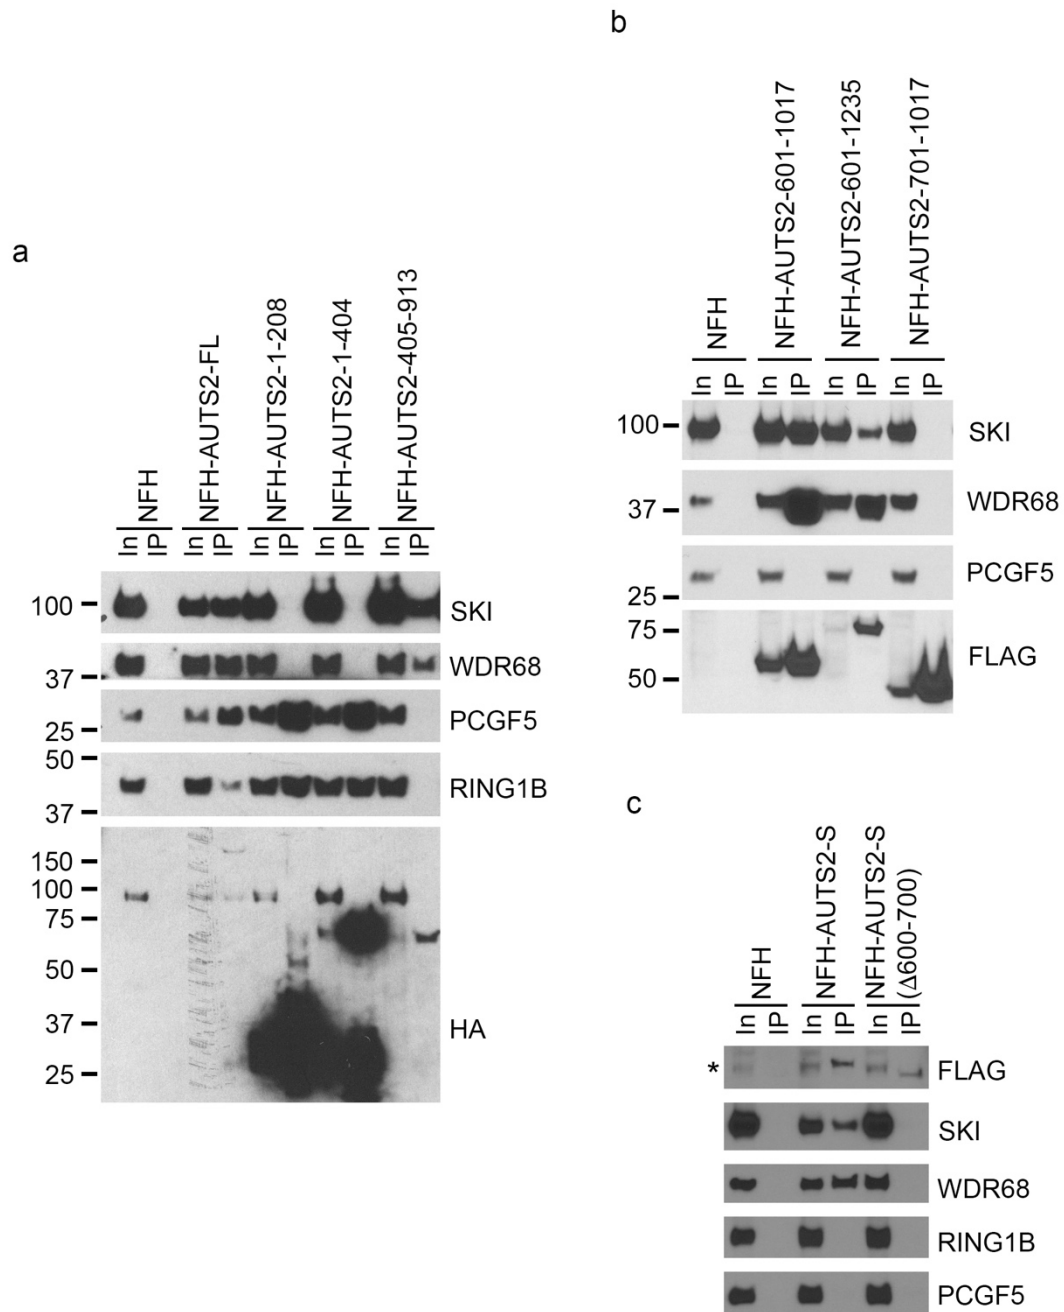

**Figure S5. Domain mapping of AUTS2 for interaction with various partner proteins.** *a*, *b* and *c*, HEK293T cells were transfected with plasmids expressing various lengths of FLAG and HA tagged AUTS2 as indicated. IP was performed using M2 beads. Bound proteins were resolved on SDS-PAGE and detected by Western blotting for the indicated antigens.

**Table S1 Plasmids**

|    | Plasmid Name             | Source               | Vector              | Enzyme sites | Tags      |
|----|--------------------------|----------------------|---------------------|--------------|-----------|
| 1  | pINTO-NFH-AUTS2-L        | Gao et al., 2014     | pINTO-NFH           | KpnI/EcoRI   | N-FLAG-HA |
| 2  | pINTO-NFH-AUTS2-S        | This study           | pINTO-NFH           |              | N-FLAG-HA |
| 3  | pINTO-NFH-AUTS2-8-208    | This study           | pINTO-NFH           | KpnI/XhoI    | N-FLAG-HA |
| 4  | pINTO-NFH-AUTS2-8-404    | This study           | pINTO-NFH           | KpnI/XhoI    | N-FLAG-HA |
| 5  | pINTO-NFH-AUTS2-405-913  | This study           | pINTO-NFH           | KpnI/XhoI    | N-FLAG-HA |
| 6  | pINTO-NFH-AUTS2-601-1017 | This study           | pINTO-NFH           |              | N-FLAG-HA |
| 7  | pINTO-NFH-AUTS2-601-1235 | This study           | pINTO-NFH           |              | N-FLAG-HA |
| 8  | pINTO-NFH-AUTS2-701-1017 | This study           | pINTO-NFH           |              | N-FLAG-HA |
| 9  | pINTO-NFH-AUTS2-701-1235 | This study           | pINTO-NFH           |              | N-FLAG-HA |
| 10 | HA-SKI                   | Addgene, #10910      | pCI-Neo             | XhoI/HpaI    | N-HA      |
| 11 | HA-DDB1                  | Addgene, #19909      | pCDNA3-HA2          |              | N-HA      |
| 12 | HA-ub                    | Iwahara et al., 2012 |                     |              | HA        |
| 13 | FLAG-SMAD1               | Addgene, #11735      | pCMV5B              | ClaI/BamHI   | N-FLAG    |
| 14 | DN-CUL4B                 | Addgene, #15822      | pCDNA3.1(+)         | BamHI/ApaI   | C-FLAG    |
| 15 | pLV-EF1a-IRES-Blast      | Addgene, #85133      | pLV-EF1a-IRES-Blast | BamHI/EcoRI  |           |
| 16 | pLV-hAUTS2-S             | This study           | pLV-EF1a-IRES-Blast | BamHI/EcoRI  |           |
| 17 | pLV-hAUTS2-Δ             | This study           | pLV-EF1a-IRES-Blast | BamHI/EcoRI  |           |



**Table S2 Antibodies used in this study**

| <b>Antibody</b>  | <b>Suppliers</b>         | <b>Catalog No.</b> | <b>Lot No.</b> | <b>Applications</b> |
|------------------|--------------------------|--------------------|----------------|---------------------|
| AUTS2            | Gao et al., 2014         |                    |                | WB, IF              |
| AUTS2            | Sigma                    | HPA000390          |                | WB                  |
| WDR68            | Sigma                    | HPA022948          | A76005         | WB                  |
| SKI              | Santa Cruz               | sc33693            |                | WB                  |
| SMAD1            | Cell Signaling           | 6944               | lot: 5         | WB                  |
| SMAD2            | Cell Signaling           | 5339               | lot: 4         | WB                  |
| SMAD4            | Cell Signaling           | 38454              | lot: 1         | WB                  |
| SMAD5            | Cell Signaling           | 12534              | lot: 2         | WB                  |
| pSMAD2           | Cell Signaling           | 3108               | lot: 8         | WB                  |
| pSMAD1/5/9       | Cell Signaling           | 13820              | lot: 3         | WB                  |
| RING1B           | BETHYL                   | A302-869A          | A302-869A-1    | WB                  |
| PCGF3/5          | Abcam                    | ab201510           |                | WB                  |
| PCGF5            | ABCAM                    | ab201511           |                | WB                  |
| DDB1             | Santa Cruz               | sc376860           | A2318          | WB                  |
| NANOG            | Invitrogen               | PA1-41577          |                | WB                  |
| OCT4             | Santa Cruz               | sc365509           | L1817          | WB                  |
| PAX6             | DSHB                     | Pax6-s             |                | WB                  |
| NESTIN           | BD                       | 611658             |                | WB, IF              |
| HA               | Covance                  | MMS-101P           |                | WB                  |
| HA               | Abcam                    | ab9110             | GR98618-3      | WB                  |
| HA beads         | Sigma                    | A2095              |                | IP                  |
| FLAG             | Sigma                    | F3165              |                | WB                  |
| FLAG beads       | Sigma                    | A2220              |                | IP                  |
| $\beta$ -TUBULIN | Abcam                    | ab6046             |                | WB                  |
| GAPDH            | Thermo Fisher Scientific | MA5-15738          | GA1R           | WB                  |
| ACTIN            | Abcam                    | ab8277             |                | WB                  |
| H3               | Abcam                    | ab1791             |                | WB                  |

**Table S3 List of primers for qPCR  
For RT-PCR**

| Name                 | Sequence (F/R)                                                    |
|----------------------|-------------------------------------------------------------------|
| <i>mOct4</i>         | 5'-AGATCACTCACATCGCCAATCA-3' / 5'-CGCCGGTTACAGAACCATACTC-3'       |
| <i>mSox9</i>         | 5'-AGCGAACGCACATCAAGA-3' / 5'-CTGTAGTGAGGAAGGTTGAAGG-3'           |
| <i>mNanog</i>        | 5'-AGGCTTTGGAGACAGTGAGGTG-3' / 5'-TGGGTAAGGGTGTTC AAGCACT-3'      |
| <i>mNes</i>          | 5'-AGTGCCCAAGTTCTAGTGGTGTCC-3' / 5'-CCTCTAAAATAGAGTGGTGAGGGTTG-3' |
| <i>mTbx2</i>         | 5'-ATGTACATCCACCCGGACAG-3' / 5'-GACAGCGATGAAGTCGGTCT-3'           |
| <i>mDpysl2</i>       | 5'-CAGAATGGTGATTCCCGGAGG-3' / 5'-CAGCCAATAGGCTCGTCCC-3'           |
| <i>mSnai1</i>        | 5'-CCGATGAGGACAGTGGCAA-3' / 5'-CCCAGGCTGAGGTACTCCTT-3'            |
| <i>mNeurod1</i>      | 5'-CGAGTCATGAGTGCCAGCTTA-3' / 5'-CCGGAATAGTGAAACTGACGTG-3'        |
| <i>mId2</i>          | 5'-CTACTCCAAGCTCAAGGAAGT-3' / 5'-GATCTGCAGTCCAAGATGTAA-3'         |
| <i>mPax6</i>         | 5'-CTTGGGAAATCCGAGACAGA-3' / 5'-CTAGCCAGGTTGCGAAGAAC-3'           |
| <i>m18SrRNA</i>      | 5'-GCAATTATCCCATGAACG-3' / 5'-GGCCTCACTAAACCATCCAA-3'             |
| <i>mTubb2a</i>       | 5'-GGAGGTGATAAGCGATGAGCATG-3' / 5'-GGCTCCAGGTCCACTAGGATG-3'       |
| <i>mHoxa6</i>        | 5'-GTGACCCTACTGCCATCTTAC-3' / 5'-GAATAATCACCGCAGGACTCT-3'         |
| <i>mWwc2</i>         | 5'-TCATCTGGGAGCAGTCTAGGG-3' / 5'-TGATAGTCTGTGTCCATCTGGTC-3'       |
| <i>mHand1</i>        | 5'-TCGCTACACTTCCTACCTAGAG-3' / 5'-GAAGGAAAGGAAGGAAAGAT-3'         |
| <i>mTubb3</i>        | 5'-TGAGGCCTCCTCTCACAAGT-3' / 5'-GGCCTGAATAGGTGTCCAAA-3'           |
| <i>mGata6</i>        | 5'-TGCAGGATTGCATCATGACAGA-3' / 5'-TGACCTCAGATCAGCCACGTT-3'        |
| <i>mVglut1</i>       | 5'-TGCTACCTCACAGGAGAATGGA-3' / 5'-GCGCACCTTCTTGACAAAAT-3'         |
| <i>mGap43</i>        | 5'-TGTGCCTGCTGCTGCTACTGAT-3' / 5'-AGGTTTGGCTTCGTCTACAGCG-3'       |
| <i>mGata4</i>        | 5'-TTCCTCTCCAGGAACATCAAA-3' / 5'-GCTGCACAACCTGGGCTCTACTT-3'       |
| <i>mSox1</i>         | 5'-GGCCGAGTGGAAGGTCAT-3' / 5'-ACTTGTAATCCGGGTGTTCCCT-3'           |
| <i>mNkx2-5</i>       | 5'-GATGGGAAAGCTCCCACTATG-3' / 5'-GACACCAGGCTACGTCAATAAA-3'        |
| <i>mT(Brachyury)</i> | 5'-TGCACATTACACACCACTGACG-3' / 5'-AGAACCAGAAGACGAGGACGT-3'        |
| <i>mMap2</i>         | 5'-AAAGGCCCGCGTAGATCAC-3' / 5'-GGGATTCGAGCAGGTTGATG-3'            |

**For geno typing**

| Name                 | Sequence                           |
|----------------------|------------------------------------|
| <i>mWdr68KI-1F</i>   | 5'-CAGCCCGCTGCCTCTCTGG-3'          |
| <i>mWdr68KI-1R</i>   | 5'-TTCCACGAAGCTGCCAGCG-3'          |
| <i>mAuts2KO-7F</i>   | 5'-TTTTATAGATTTTTCTTTATCCACATGT-3' |
| <i>mAuts2KO-7R</i>   | 5'-GGTGTGTGCCATCATTCTGGG-3'        |
| <i>mAuts2KO-9F</i>   | 5'-GGAAGTGAACACGCGTTTCCTG-3'       |
| <i>mAuts2KO-9R</i>   | 5'-CACAGTGCCAGCAATGGCCATC-3'       |
| <i>mAuts2KO-6F</i>   | 5'-GCTGGTGTGAATGTATACACAAGT-3'     |
| <i>mAuts2KO-6R</i>   | 5'-TGGCACCAAAGGTGTTACTATTCC-3'     |
| <i>mAuts2KO-6FWT</i> | 5'-CCTAATCCAGCTCTGGCTCCCA-3'       |
| <i>mSKI-F</i>        | 5'-AAAGATGTGCGCCAGTGCGCA-3'        |
| <i>mSKI-R</i>        | 5'-CAGGATGCCCATGACTTTGAGGA-3'      |
